## CORRECTION

## Correction: Science maps for exploration, navigation, and reflection—A graphic approach to strategic thinking

Flemming Skov

[Fig 11](#) is uploaded incorrectly. Please see the correct [Fig 11](#) and its caption here.

In the Distribution of scientific papers and their Web of Science subject categories subsection of Results, there is an error in the fourth sentence of the fourth paragraph. The correct sentence is: [Fig 11](#) shows the density profiles for Microbiology, Biodiversity Conservation and Evolutionary Biology with centers of distribution in three of the four major quadrants in the map (north-west, south-west and south-east, respectively).

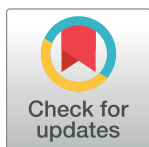

## OPEN ACCESS

**Citation:** Skov F (2024) Correction: Science maps for exploration, navigation, and reflection—A graphic approach to strategic thinking. PLoS ONE 19(12): e0316560. <https://doi.org/10.1371/journal.pone.0316560>

**Published:** December 26, 2024

**Copyright:** © 2024 Flemming Skov. This is an open access article distributed under the terms of the [Creative Commons Attribution License](#), which permits unrestricted use, distribution, and reproduction in any medium, provided the original author and source are credited.

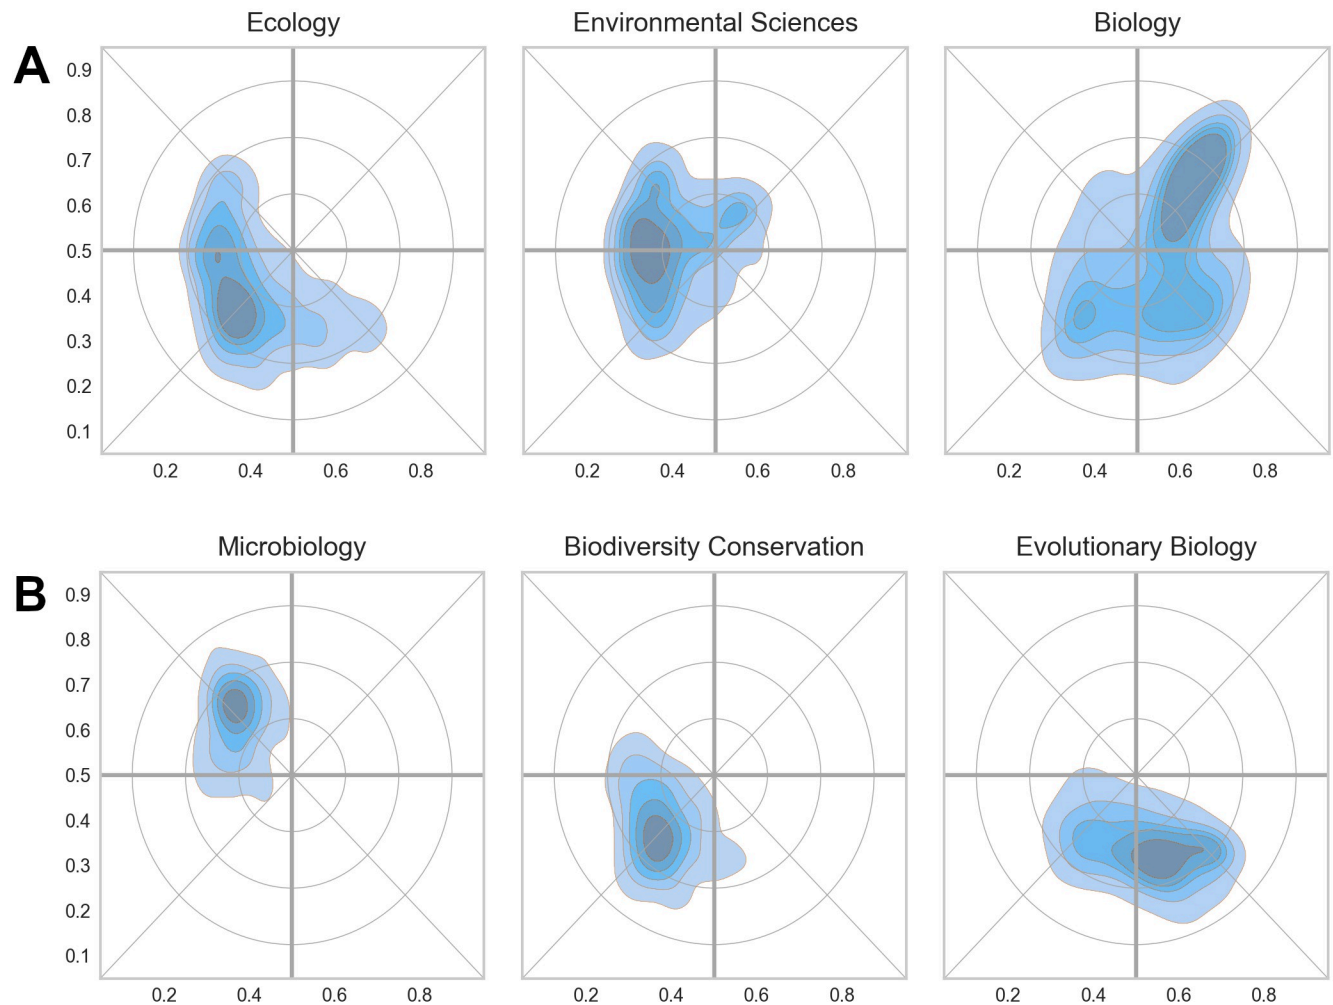

**Fig 11. 1. Examples of broad (11A) and narrow (11B) Web of Science Subject Categories in the reference landscapes.** The color of the shading is not uniform across the figure but is relative to the category in question.

<https://doi.org/10.1371/journal.pone.0316560.g001>

## Reference

1. Skov F (2021) Science maps for exploration, navigation, and reflection—A graphic approach to strategic thinking. PLOS ONE 16(12): e0262081. <https://doi.org/10.1371/journal.pone.0262081> PMID: 34972185
